# Supplementary material
Source: PubMed Central journal article supplement (PMC2544455)
Supplement: supp_90478.2008_captions.pdf [file supp_90478.2008_captions.pdf]

**Movie 1:** Stimulation in the superior colliculus evokes a sustained protraction of the vibrissae. A black dot in the upper left-hand corner indicates the onset and duration of microstimulation.

**Movie 2:** Stimulation in the motor cortex evokes rhythmic protractions of the vibrissae. A black dot in the upper left-hand corner indicates the onset and duration of microstimulation.
